# Supplementary material for: Real-world assessment of drug related problems by medication reviews at the emergency department in older patients living with frailty
Source: Research Square preprint supplement (doi:10.21203/rs.3.rs-2230828/v1), 2022-11-12
Supplement: Supplementary file 2 [file ea558fadc9718169e19ee928.docx]

**Tables**

**Table 1.** Demographic and drug-related patient characteristics (n=356). Values are reported in number (n) and %, unless otherwise specified.

| Variable | n (%) | ≥1 DRP  n (%) | 0 DRPs  n (%) |
| --- | --- | --- | --- |
| Emergency department visits | 356 (100) | 270 (76) | 86 (24) |
| Age, mean (SD) | 83 (6.8) | 83 (6.8) | 82 (6.5) |
| Sex  Male  Female | 139 (39)  217 (61) | 105 (39)  165 (61) | 34 (40)  52 (60) |
| Number of medications per patient, mean (SD) | 8 (4.7) | 9 (4.5) | 5 (4.0) |
| Polypharmacy | 158 (45) | 127 (47) | 31 (36) |
| Cause of emergency department visit |  |  |  |
| Bleeding | 14 (3.9) | 13 (4.8) | 1 (1.2) |
| Vomit/diarrhea | 7 (2.0) | 6 (2.2) | 1 (1.2) |
| Collapse/hypotension/vertigo | 9 (2.5) | 9 (3.3) | 0 |
| Delirium/confused/drowsy | 11(3.1) | 11 (4.1) | 0 |
| Electrolyte disturbances/dehydration | 7 (2.0) | 6 (2.2) | 1 (1.2) |
| Fracture/fall | 192 (54) | 142 (53) | 50 (58) |
| Heart failure | 1 (0.3) | 0 (0) | 1 (1.2) |
| Kidney failure | 1 (0.3) | 1 (0.4) | 0 |
| Obstipation/ileus | 2 (0.6) | 2 (0.7) | 0 |
| Disrupted blood glucose levels | 2 (0.6) | 2 (0.7) | 0 |
| Other† | 110 (31) | 78 (29) | 32 (37) |
| Hospital admission  Yes  No | 233 (66)  123 (35) | 181 (67)  89 (33) | 52 (60)  34 (40) |
| Number of DRPs  No DRP  1 DRP  2 DRPs  ≥3 DRPs | 1.5 (1.3)  86 (24)  104 (29)  95 (27)  71 (20) | 2.0 (1.1)  NA  104 (38)  95 (36)  71 (26) | NA  NA  NA  NA  NA |

***†*** *This category includes others infections, dyspnea (due to COVID-19) and unbearable pain.*

Abbreviations: DRP = drug related problem, NA = not applicable, SD = standard deviation.

**Table 2.** Causes of DRPs according to the Pharmaceutical Care Network Europe (PCNE) classification system. In total, 548 DRPs were identified during the study period.

| Cause | n (%) |
| --- | --- |
| *C1: Drug selection* | 394 (72) |
| C1.1 Inappropriate drug according to guidelines | 62 (11) |
| C1.2 According to guidelines but contra-indicated | 71 (13) |
| C1.3 No indication for drug | 139 (25) |
| C1.4 Inappropriate combination of drug, or drugs and food | 2 (0.4) |
| C1.5 Inappropriate duplication of therapeutic group or active ingredient | 10 (1.8) |
| C1.6 No treatment for indication | 75 (14) |
| C1.7 Too many drugs for indication | 35 (6.4) |
| *C2: Drug form* | 0 (0) |
| C2.1 Inappropriate drug form | 0 (0) |
| *C3: Dose selection* | 97 (18) |
| C3.1 Drug dose too low | 12 (2.2) |
| C3.2 Drug dose too high | 51 (9.3) |
| C3.3 Dose not frequent enough | 5 (0.9) |
| C3.4 Dose too frequent | 25 (4.6) |
| C3.5 Dosing time is wrong, unclear or missing | 4 (0.7) |
| *C4: Treatment duration* | 31 (5.7) |
| C4.1 Duration of treatment too short | 0 (0) |
| C4.2 Duration of treatment too long | 31 (5.7) |
| *C5: Dispensing* | 0 (0) |
| *C6: Drug use* | 0 (0) |
| *C7: Patient related* | 5 (0.9) |
| C7.1 Patient takes less or none of the drug | 3 (0.5) |
| C7.8 Patient administered/uses drug in a wrong way | 2 (0.4) |
| *C8: Other causes†* | 21 (3.8) |
| C8.1 No or inappropriate outcome monitoring (TDM) | 7 (1.3) |
| C8.2 Other cause | 14 (2.6) |

**†** *This category includes, among other causes, considering a fixed dose combination and allergy registration in the electronic patient management system.*

Abbreviation: TDM = therapeutic drug monitoring

**Table 3.** Distribution of causes of drug-related problems (DRPs) per anatomical therapeutic chemical (ATC) group. Numbers in bold are the highest values in each column.

|  | Drug  selection  (C1) | | | | | Dose selection (C3) | Treatment duration (C4) | Patient related (C7) | Other causes (C8) † |
| --- | --- | --- | --- | --- | --- | --- | --- | --- | --- |
| Inappropriate drug according to guidelines (C1.1) | Contra-indicated (C1.2) | No indication for drug (C1.3) | No treatment for indication (C1.6) | Too many drugs for indication (C1.7) |  |  |  |  |
| n = 62 | n = 71 | n = 139 | n = 75 | n = 35 | n = 97 | n = 31 | n = 5 | n = 21 |
| ATC group |  |  |  |  |  |  |  |  |  |
| Alimentary tract and metabolism (ATC group A) | 3 | 6 | **82** | **28** |  | 22 | 1 | 1 | 1 |
| Blood and blood-forming organs  (ATC group B) | 1 | 4 | 8 | 6 |  | 11 | 7 |  | 1 |
| Cardiovascular system (ATC group C) | 6 | **35** | 25 | 3 | **32** | 17 |  | 1 | 7 |
| Genitourinary system and reproductive hormones (ATC group G) |  | 2 |  |  |  |  | **13** |  | 1 |
| Systemic hormonal preparations excluding reproductive hormones and insulin (ATC group H) |  | 1 | 1 | 5 |  |  |  |  | 1 |
| Anti-infective agents for systemic use (ATC group J) | 1 | 2 | 2 | 1 |  | 2 | 2 |  |  |
| Antineoplastic and immunomodulating agents (ATC group L) |  | 1 | 2 |  |  |  | 1 |  | 1 |
| Musculoskeletal system (ATC group M) | 3 | 11 | 2 | 20 |  | 1 | 2 |  |  |
| Nervous system (ATC group N) | **41** | 8 | 9 | 8 | 1 | **33** | 1 |  | 6 |
| Respiratory system (ATC group R) | 3 |  | 5 | 2 |  | 7 |  | 2 |  |
| Various (ATC group V) | 4 | 1 | 3 | 2 | 2 | 4 | 4 | 1 | 3 |

**†** *This category includes, among other causes, the absence of therapeutic drug monitoring or the use of controlled-release tablets instead of immediate release* *tablets.*

**Supplementary files**

**Supplementary Table 1.** Trigger tool to identify adverse events [11].

| **Trigger** | **Potentially associated drug** |
| --- | --- |
| Fracture/fall | Psychoactive drugs/corticosteroids/antihypertensive drugs |
| Collapse/hypotension/dizziness | Antihypertensive drugs/anti-arrhythmic drugs/ Psychoactive drugs |
| Bleeding/increased INR | Anticoagulants/thrombocyte aggregation inhibitors/NSAIDs |
| Electrolyte imbalance/dehydration | Diuretics/ACE-inhibitors/AII-inhibitors/NSAIDs/antidepressants drugs |
| Renal insufficiency | ACE-inhibitors/AII-inhibitors/NSAIDs |
| Blood sugar imbalance | Glucose-lowering drugs/ corticosteroids |
| Heart failure | NSAIDs |
| Obstipation/ileus | Opioids/calcium channel blockers |
| Vomiting/diarrhea | Antibiotics |
| Delirium/ drowsiness | Psychoactive drugs//antihypertensive drugs/ anti-arrhythmic drugs/alpha blockers/ benzodiazepines |

Abbreviations: ACE = angiotensine converting enzyme, AII = angiotensine II, INR = international normalized ratio, NSAIDs = non-steroidal anti-inflammatory drugs
